# Supplementary material
Source: MDPI journal article supplement (https://www.mdpi.com/2673-8007/4/2/54)
Supplement: s1 [file s1]

**Table S2** Primer sequences and amplification conditions used to bridge sequence contigs of ESBL plasmid pIHIT34097.

| BRIDGE | PRIMER NO. (NAME)        | PRIMER SEQUENCE (5'→3') | BASE PAIRS | ANNEALING TEMPERATURE | EXTENSION TIME |
|--------|--------------------------|-------------------------|------------|-----------------------|----------------|
| 1 FW   | 1918 (repA-IncFIB(K)-RP) | GCCATTCAGAACCTGTATCAG   | 3602 bp    | 55 °C                 | 270 s          |
| RV     | 1964 (Primer 1 rv)       | ACCAGCGAACGTAAATAATC    |            |                       |                |
| 2 FW   | 1965 (Primer 2.1 fw)     | TCGGTGGAGTGGAAGTATG     | 2547 bp    | 58 °C                 | 180 s          |
| RV     | 1966 (Primer 2.1 rv)     | ATTATCGTCTGAGGGCCGG     |            |                       |                |
| 3 FW   | 1967 (Primer 2.2 fw)     | AGTCAGAACAAATCAATGCCG   | 2043 bp    | 57 °C                 | 120 s          |
| RV     | 1968 (Primer 2.2 rv)     | AGATCCTGCGCCAGTAATTC    |            |                       |                |
| 4 FW   | 463 (345_R)              | CATTCCTGGCCGTGGTTCT     | 2971 bp    | 58 °C                 | 180 s          |
| RV     | 380 (qnrB.f)             | GATCGTGAAAGCCAGAAAGG    |            |                       |                |
| 5 FW   | 1975 (Primer 3.2 fw)     | ATCGGAGGATGAGGTCGTG     | 2035 bp    | 59 °C                 | 150 s          |
| RV     | 393 (aac(6)-Ib.r)        | CTCGAATGCCTGGCGTGTTT    |            |                       |                |
| 6 FW   | 394 (aac(6)-Ib-cr)       | CGTCACTCCATACATTGCAA    | 2890 bp    | 58 °C                 | 180 s          |
| RV     | 1970 (Primer 4 rv)       | TCCTTCGACCGGACCAATC     |            |                       |                |
| 7.1 FW | 1971 (Primer 5 fw)       | TGCACACACCAGCGATGAAC    | 4403 bp    | 59 °C                 | 270 s          |
| RV     | 1972 (Primer 5 rv)       | ACAGGTTTCCCCCAATATCGC   |            |                       |                |
| 7.2 FW | 1971(Primer 5 fw)        | TGCACACACCAGCGATGAAC    | 5334 bp    | 58 °C                 | 330 s          |
| RV     | 1655 (CTX-Mu-for)        | CGCTTTGCGATGTGCAG       |            |                       |                |
| 8.1 FW | 1656 (CTX-Mu-rev)        | ACCGCGATATCGTTGGT       | 4424 bp    | 55 °C                 | 270 s          |
| RV     | 327 (TEM Grimm rev)      | TTAATCAGTGAGGCACCTAT    |            |                       |                |
| 8.2 FW | 1973 (Primer 6 fw)       | ACAGCGGCACACTTCCTAAC    | 3751 bp    | 56 °C                 | 240 s          |
| RV     | 327 (TEM Grimm rev)      | TTAATCAGTGAGGCACCTAT    |            |                       |                |
